# Supplementary material for: Direct access to triazole-olefins through catalytic cycloaddition of azides to unsaturated aldehydes
Source: Royal Society of Chemistry journal article supplement (doi:10.1039/c3cc45306e), 2013-01-01
Supplement: c3cc45306e_2.pdf [file c3cc45306e_2.pdf]

**From:** [CCDC Deposit](#)  
**To:** [Wang Jian](#)  
**Subject:** CCDC Depository Request CRM:0001296  
**Date:** Wednesday, May 01, 2013 5:14:30 PM

---

Dear Jian Wang

Thank you for depositing your crystal structure(s) at the Cambridge Crystallographic Data Centre. The data have been assigned the following deposition numbers.

CCDC 936787

-----  
Summary of Data CCDC 936787  
-----

Compound Name:  
Formula: C<sub>16</sub> H<sub>13</sub> N<sub>3</sub>  
Unit Cell Parameters: a 11.8598(10) b 5.6497(4) c 18.4376(15) Pna21  
Authors:  
-----

If we have any queries relating to the data then we will contact you later.

Data submitted as a Private Communication will be processed and added to the Cambridge Structural Database (CSD). Please note, if the data have not appeared in a journal publication 3 years after the date of deposition, and the CCDC cannot contact you to discuss the matter, then the CCDC will automatically include the data in the CSD as a Private Communication.

Kind regards,

Data Acquisition Team

-----

You can deposit your CIFs and structure factors via the internet, using our online service.

[https://www.ccdc.cam.ac.uk/services/structure\\_deposit/](https://www.ccdc.cam.ac.uk/services/structure_deposit/)
